# Supplementary material for: Antidepressant Self-Discontinuation: Results From the Collaborative Psychiatric Epidemiology Surveys
Source: Atypon-hosted journal article supplement (doi:10.1176/appi.ps.201400021), 2014-12-17
Supplement: appi.ps.201400021.ds001.pdf [file appi.ps.201400021.ds001.pdf]

| <b>Reasons for self-discontinuation of 334 individual antidepressant medication treatment episodes in 313 participants of the Collaborative Psychiatric Epidemiology Surveys, 2001-2003.</b> |         |                                                                         |                         |                          |                            |                     |               |
|----------------------------------------------------------------------------------------------------------------------------------------------------------------------------------------------|---------|-------------------------------------------------------------------------|-------------------------|--------------------------|----------------------------|---------------------|---------------|
|                                                                                                                                                                                              |         | Specific reasons for self-discontinuation of antidepressant medications |                         |                          |                            |                     |               |
| Characteristics                                                                                                                                                                              | Total N | Side Effects                                                            | Medications ineffective | Medications unaffordable | Resolve without medication | Attitudinal reasons | Other Reasons |
|                                                                                                                                                                                              |         | N (Col %)                                                               | N (Col %)               | N (Col %)                | N (Col %)                  | N (Col %)           | N (Col %)     |
| <b>Sex</b>                                                                                                                                                                                   |         |                                                                         |                         |                          |                            |                     |               |
| Female                                                                                                                                                                                       | 263     | 64 (84)                                                                 | 57 (75)                 | 16 (49)                  | 35 (70)                    | 20 (75)             | 45 (64)       |
| Male                                                                                                                                                                                         | 71      | 8 (16)                                                                  | 16 (25)                 | 7 (51)                   | 11 (30)                    | 3 (25)              | 20 (36)       |
| <b>Age (years)</b>                                                                                                                                                                           |         |                                                                         |                         |                          |                            |                     |               |
| 18-30                                                                                                                                                                                        | 84      | 18 (24)                                                                 | 23 (37)                 | 5 (52)                   | 13 (29)                    | 12 (47)             | 17 (35)       |
| 31-40                                                                                                                                                                                        | 87      | 21 (33)                                                                 | 15 (11)*                | 8 (16)                   | 15 (27)                    | 4 (19)              | 21 (25)       |
| 41-50                                                                                                                                                                                        | 98      | 25 (30)                                                                 | 22 (32)                 | 7 (21)                   | 14 (35)                    | 6 (30)              | 14 (19)       |
| 51+                                                                                                                                                                                          | 65      | 8 (12)                                                                  | 13 (21)                 | 3 (11)                   | 4 (8)                      | 1 (4)*              | 13 (21)       |
| <b>Race</b>                                                                                                                                                                                  |         |                                                                         |                         |                          |                            |                     |               |
| White                                                                                                                                                                                        | 172     | 37 (79)                                                                 | 36 (76)                 | 10 (81)                  | 24 (83)                    | 9 (69)              | 38 (85)       |
| Black                                                                                                                                                                                        | 52      | 9 (5)                                                                   | 10 (5)                  | 2 (1)                    | 5 (3)                      | 1 (1)               | 4 (1)*        |
| Latino                                                                                                                                                                                       | 61      | 17 (14)*                                                                | 18 (13)                 | 5 (8)                    | 12 (11)                    | 9 (21)*             | 11 (6)        |
| Other                                                                                                                                                                                        | 49      | 9 (2)                                                                   | 9 (6)                   | 6 (11)                   | 5 (3)                      | 4 (8)               | 12 (8)        |
| <b>Education</b>                                                                                                                                                                             |         |                                                                         |                         |                          |                            |                     |               |
| 0-11                                                                                                                                                                                         | 69      | 13 (13)                                                                 | 19 (23)                 | 5 (8)                    | 10 (18)                    | 8 (36)              | 10 (12)       |
| 12                                                                                                                                                                                           | 95      | 21 (46)                                                                 | 23 (30)*                | 8 (60)                   | 13 (35)                    | 2 (6)**             | 19 (29)       |
| 13-15                                                                                                                                                                                        | 106     | 25 (29)                                                                 | 20 (32)                 | 8 (24)                   | 10 (26)                    | 7 (17)              | 24 (45)       |
| 16+                                                                                                                                                                                          | 64      | 13 (13)                                                                 | 11 (15)*                | 2 (8)                    | 13 (21)                    | 6 (41)              | 12 (14)       |
| <b>Diagnosis<sup>a</sup></b>                                                                                                                                                                 |         |                                                                         |                         |                          |                            |                     |               |
| No mood, anxiety or substance disorder                                                                                                                                                       | 160     | 30 (45)                                                                 | 27 (33)                 | 5 (50)                   | 16 (31)                    | 7 (27)              | 27 (33)       |
| Mood disorder                                                                                                                                                                                | 92      | 22 (23)                                                                 | 26 (38)*                | 13 (39)                  | 18 (35)                    | 13 (56)*            | 21 (39)       |
| Anxiety disorder                                                                                                                                                                             | 143     | 34 (46)                                                                 | 36 (52)                 | 15 (42)                  | 22 (57)                    | 14 (69)*            | 33 (56)       |
| Substance disorder                                                                                                                                                                           | 26      | 6 (6)                                                                   | 9 (14)                  | 3 (5)                    | 4 (14)                     | 5 (28)              | 11 (24)**     |
| <b>Prescriber</b>                                                                                                                                                                            |         |                                                                         |                         |                          |                            |                     |               |
| Psychiatrist                                                                                                                                                                                 | 70      | 17 (16)                                                                 | 17 (24)                 | 11 (73)                  | 9 (19)                     | 5 (12)              | 10 (11)       |
| PCP                                                                                                                                                                                          | 181     | 36 (66)                                                                 | 34 (47)                 | 7 (13)**                 | 28 (59)                    | 14 (78)             | 34 (82)*      |

|            |     |         |         |         |         |          |         |
|------------|-----|---------|---------|---------|---------|----------|---------|
| Other      | 46  | 13 (17) | 14 (29) | 3 (15)  | 9 (23)  | 3 (10)   | 6 (7)   |
| Medication |     |         |         |         |         |          |         |
| SSRI       | 212 | 43 (67) | 48 (67) | 14 (53) | 35 (71) | 19 (89)* | 39 (64) |
| SNRI       | 19  | 6 (4)   | 1 (0)** | 1 (5)   | 3 (12)  | 0 (0)    | 4 (6)   |
| TCA        | 36  | 8 (5)   | 4 (4)   | 1 (4)   | 4 (5)   | 2 (3)*   | 8 (10)  |
| Other      | 67  | 15 (23) | 20 (29) | 7 (38)  | 4 (11)  | 2 (9)    | 14 (20) |

*Note:* PCP stands for primary care physician, SSRI for selective serotonin reuptake inhibitor, SNRI for selective norepinephrine reuptake inhibitor and TCA for tricyclic antidepressant.

<sup>a</sup> Percentages add to more than 100% because some participants met criteria for more than one diagnosis.

\* $p < .05$ , \*\* $p < .01$ , based on results of logistic regression analyses comparing each reason of discontinuation with all other reasons combined.
